# Supplementary material
Source: publisher figshare collection journal article supplement (https://gsapubs.figshare.com/articles/dataset/_/14699550)
Supplement: Supplementary file 1 [file 1]

**Table S1.** Sampling locations and descriptions of the volcanic rocks from the Mariana Islands and Mariana Trough.

| **Sampling sites** | **Samples** | **Latitude**  **(N)** | **Longitude**  **(E)** | **Water depth**  **(m)** | **Benioff zone depth (km)** | **Samples description** |
| --- | --- | --- | --- | --- | --- | --- |
| ***Northern Mariana Islands*** | | | | | | |
| T1-1 | T1-1 | 21°19′ | 144°11′ | 418 | 130 | Dacite, phyric, Cpx + Opx + Pl, matrix is mainly composed of Pl and glass. |
| T1-3 | T1-3 | 21°29′ | 144°02′ | 1604 | 135 | Basaltic andesite, phyric, Ol + Cpx + Opx + Pl, matrix is mainly composed of Pl and glass. |
| T1-4 | T1-4-01 | 21°36′ | 143°38′ | 434 | 170 | Andesite, phyric, Ol + Cpx + Opx + Pl, matrix is mainly composed of Pl and glass. |
| T1-4-02 | Andesite, phyric, Ol + Cpx + Opx + Pl, matrix is mainly composed of Pl and glass. |
| ***Central Mariana Islands*** | | | | | | |
| Guguan*#* | GUG6(1) | 17°19.6′ | 145°50.7′ |  | 170 | Basalt, phyric, Ol + Cpx + Opx + Mgt. |
| GUG9 | 17°19.8′ | 145°50.8′ |  | 170 | Basalt, phyric, Ol + Cpx + Opx + Mgt. |
| GUG11 | 17°19.9′ | 145°50.9′ |  | 170 | Basaltic andesite, phyric, Ol + Cpx + Opx + Mgt. |
| GUG12 | 17°20.0′ | 145°50.9′ |  | 170 | Basaltic andesite, phyric, Ol + Cpx + Opx + Mgt. |
| GUG13 | 17°19.2′ | 145°50.3′ |  | 180 | Basalt, phyric, Ol + Cpx + Opx + Mgt. |
| GUG13r | Basalt, phyric, Ol + Cpx + Opx + Mgt. |
| Alamagan*#* | ALAM2 | 17°37.0′ | 145°49.6′ |  | 200 | Basaltic andesite, phyric, Ol + Cpx + Opx + Mgt. |
| ALAM5 | 17°35.2′ | 145°49.7′ |  | 190 | Basaltic andesite, phyric, Ol + Cpx + Opx + Mgt. |
| Agrigan*#* | AGR2 | 18°44.4′ | 145°38.9′ |  | 260 | Basalt, phyric, Ol + Cpx + Opx + Mgt. |
| AGR4b | 18°48.0′ | 145°38.9′ |  | 260 | Basalt, phyric, Ol + Cpx + Opx + Mgt. |
| AGR4br |  | Basalt, phyric, Ol + Cpx + Opx + Mgt. |
| AGR5 | 18°47.4′ | 145°38.4′ |  | 260 | Basalt, phyric, Ol + Cpx + Opx + Mgt. |
| AGR8b | 18°43.9′ | 145°40.3′ |  | 250 | Basalt, phyric, Ol + Cpx + Opx + Mgt. |
| AGR8br |  | Basalt, phyric, Ol + Cpx + Opx + Mgt. |
| MM-92-6 | 18°46.4′ | 145°40.0′ |  | 250 | Basaltic andesite, phyric, Ol + Cpx + Opx + Mgt. |
| Uracas*#* | URA5 | 20°32.4′ | 145°51.9′ |  | 130 | Basaltic andesite, phyric, Ol + Cpx + Opx + Mgt. |
| URA5r |  | Basaltic andesite, phyric, Ol + Cpx + Opx + Mgt. |
| URA7 | 20°32.4′ | 145°51.8′ |  | 130 | Basaltic andesite, phyric, Ol + Cpx + Opx + Mgt. |
| URA12 | 20°32.7′ | 145°51.3′ |  | 130 | Basaltic andesite, phyric, Ol + Cpx + Opx + Mgt. |
| ***Central Mariana Trough*** | | | | | | |
| T2-1 | T2-1-01 | 18°12′ | 144°42′ | 3659 | 655 | Basaltic andesite, phyric, Ol + Cpx + Opx + Pl, matrix is mainly composed of Cpx, Pl and glass. |
| T2-1-02 | Basaltic andesite, glassy. |
| T2-1-03 | Basalt, phyric, Ol + Cpx + Opx + Pl, matrix is mainly composed of Cpx, Pl and glass. |
| T2-1-04 | Basaltic andesite, glassy. |
| T2-2 | T2-2-01 | 18°02′ | 144°45′ | 3854 | 640 | Basaltic andesite, phyric, Ol + Cpx + Opx + Pl, matrix is mainly composed of Pl and glass. |
| T2-2-02 | Basaltic andesite, phyric, Ol + Cpx + Opx + Pl, matrix is mainly composed of Pl and glass. |
| T2-3 | T2-3-01 | 18°00′ | 144°45′ | 4038 | 630 | Basalt, phyric, Ol + Cpx + Pl, matrix contains microcrystalline Pl and Mgt. |
| T2-3-02 | Basalt, phyric, Ol + Cpx + Pl, matrix contains microcrystalline Pl and Mgt. |
| 13DS* | 13DS1 | 18°15.4′ | 144°43′ | 3963-3710 | 655 | Basalt, phyric, Pl+Py+Sp+Mgt |
| 23DS* | 23DS1 | 18°13.03′ | 144°46.47′ | 3620-3200 | 660 | Basalt, phyric, Pl+Ol |
| 42DS* | 42DS | 18°05.47′ | 144°44.29′ | 4120-3707 | 640 | Basalt, phyric, Pl+Ol |
| 53DS* | 53DS | 18°01.85′ | 144°42.82′ | 4070-3700 | 630 | Basalt, phyric, Ol+Pl |
| 71GTV* | 71GTV-01 | 16°59.11′ | 144°50.048′ | 3314-3417 | 390 | Basalt, phyric, Ol+Pl |
| 71GTV-02 | Basalt, phyric, Ol+Pl |
| ***Southern Mariana Trough*** | | | | | | |
| T3-2 | T3-2-01 | 12°54′ | 143°38′ | 2974 | 95 | Basaltic andesite, phyric, Ol + Cpx + Opx + Pl, matrix contains microcrystalline Pl, Mgt and glass. |
| T3-2-02 | Basaltic andesite, phyric, Ol + Cpx + Opx + Pl, matrix contains microcrystalline Pl, Mgt and glass. |

#: Sampling information is from Elliott et al. (1997).

*: Sampling information is from Yan et al. (2019).

Benioff zone depths (km) are compiled from Hayes et al. (2012).

Ol-olivine, Cpx-clinopyroxene, Opx-orthopyroxene, Pl-plagioclase, Sp-spinel, Mgt-magnetite.

**Table S2.** Measured and reference trace element concentrations for international standards.

| Samples | W-2a | W-2a | W-2a | W-2a | W-2a | W-2a | Average | Reference | Std | RE% | 2RSD% | BHVO-2 | BHVO-2 | BHVO-2 | BHVO-2 | Average | Reference | Std | RE% | 2RSD% |
| --- | --- | --- | --- | --- | --- | --- | --- | --- | --- | --- | --- | --- | --- | --- | --- | --- | --- | --- | --- | --- |
| Li | 9.19 | 9.05 | 9.21 | 9.10 | 9.21 | 9.28 | 9.17 | 9.21 | 0.07 | -0.41 | 1.62 | 4.51 | 4.55 | 4.53 | 4.60 | 4.54 | 4.50 | 0.03 | 0.97 | 1.49 |
| Be | 0.66 | 0.66 | 0.67 | 0.66 | 0.70 | 0.67 | 0.67 | 0.67 | 0.01 | -0.14 | 3.75 | 1.10 | 1.10 | 1.13 | 1.07 | 1.10 | 1.08 | 0.02 | 2.17 | 3.96 |
| Sc | 35.83 | 35.76 | 35.86 | 36.48 | 35.87 | 35.89 | 35.95 | 35.86 | 0.24 | 0.25 | 1.34 | 31.88 | 31.84 | 31.90 | 31.85 | 31.86 | 31.83 | 0.03 | 0.11 | 0.16 |
| V | 265.76 | 265.15 | 265.80 | 270.83 | 267.05 | 265.48 | 266.68 | 265.80 | 1.95 | 0.33 | 1.46 | 314.87 | 315.47 | 316.55 | 316.11 | 315.75 | 318.20 | 0.64 | -0.77 | 0.40 |
| Cr | 92.90 | 92.43 | 92.00 | 93.95 | 92.62 | 91.98 | 92.64 | 92.00 | 0.67 | 0.70 | 1.44 | 293.51 | 292.92 | 293.94 | 293.78 | 293.54 | 287.20 | 0.39 | 2.21 | 0.27 |
| Co | 44.20 | 44.13 | 44.37 | 45.07 | 44.33 | 44.32 | 44.40 | 44.37 | 0.31 | 0.08 | 1.40 | 44.71 | 44.51 | 44.69 | 44.69 | 44.65 | 44.89 | 0.08 | -0.54 | 0.37 |
| Ni | 71.77 | 71.80 | 72.00 | 73.16 | 72.18 | 71.77 | 72.12 | 72.00 | 0.49 | 0.16 | 1.36 | 120.60 | 120.46 | 120.75 | 121.42 | 120.81 | 119.80 | 0.37 | 0.84 | 0.61 |
| Cu | 105.80 | 105.89 | 105.90 | 107.34 | 106.25 | 105.59 | 106.13 | 105.90 | 0.58 | 0.22 | 1.09 | 126.92 | 126.73 | 126.67 | 126.92 | 126.81 | 129.30 | 0.11 | -1.93 | 0.18 |
| Zn | 76.19 | 76.05 | 77.70 | 76.40 | 76.78 | 77.22 | 76.72 | 77.70 | 0.59 | -1.26 | 1.53 | 100.20 | 99.61 | 100.08 | 99.57 | 99.87 | 103.90 | 0.28 | -3.88 | 0.55 |
| Ga | 17.83 | 17.76 | 17.88 | 17.83 | 17.83 | 17.82 | 17.82 | 17.88 | 0.03 | -0.32 | 0.38 | 21.55 | 21.52 | 21.49 | 21.53 | 21.52 | 21.37 | 0.02 | 0.72 | 0.19 |
| Rb | 20.04 | 19.97 | 20.23 | 20.10 | 20.08 | 20.32 | 20.12 | 20.23 | 0.12 | -0.53 | 1.17 | 9.80 | 9.47 | 9.87 | 9.49 | 9.66 | 9.26 | 0.18 | 4.29 | 3.67 |
| Sr | 195.91 | 194.61 | 195.40 | 195.52 | 196.22 | 195.95 | 195.60 | 195.40 | 0.52 | 0.10 | 0.54 | 399.41 | 398.43 | 398.14 | 397.65 | 398.41 | 394.10 | 0.64 | 1.09 | 0.32 |
| Y | 21.83 | 21.74 | 21.82 | 22.00 | 21.81 | 21.86 | 21.84 | 21.82 | 0.08 | 0.10 | 0.73 | 26.54 | 26.41 | 26.59 | 26.55 | 26.52 | 25.91 | 0.07 | 2.36 | 0.50 |
| Zr | 91.93 | 91.72 | 93.30 | 99.71 | 92.04 | 93.23 | 93.66 | 93.30 | 2.78 | 0.38 | 5.93 | 182.27 | 182.49 | 182.04 | 182.37 | 182.30 | 171.20 | 0.17 | 6.48 | 0.18 |
| Nb | 7.51 | 7.49 | 7.51 | 7.50 | 7.52 | 7.50 | 7.51 | 7.51 | 0.01 | -0.05 | 0.28 | 18.79 | 18.81 | 18.76 | 18.73 | 18.77 | 18.10 | 0.03 | 3.71 | 0.33 |
| Cs | 0.89 | 0.90 | 0.92 | 0.90 | 0.90 | 0.91 | 0.90 | 0.92 | 0.01 | -1.36 | 1.85 | 0.10 | 0.10 | 0.10 | 0.10 | 0.10 | 0.10 | 0.00 | -0.49 | 3.34 |
| Ba | 171.74 | 171.34 | 172.80 | 172.36 | 172.48 | 172.58 | 172.22 | 172.80 | 0.51 | -0.34 | 0.59 | 132.57 | 132.61 | 133.08 | 132.61 | 132.72 | 130.90 | 0.21 | 1.39 | 0.31 |
| La | 10.61 | 10.61 | 10.63 | 10.69 | 10.65 | 10.66 | 10.64 | 10.63 | 0.03 | 0.10 | 0.56 | 15.26 | 15.26 | 15.32 | 15.27 | 15.28 | 15.20 | 0.03 | 0.52 | 0.35 |
| Ce | 23.19 | 23.19 | 23.21 | 23.42 | 23.28 | 23.20 | 23.25 | 23.21 | 0.08 | 0.17 | 0.71 | 37.71 | 37.65 | 37.78 | 37.71 | 37.71 | 37.53 | 0.04 | 0.49 | 0.24 |
| Pr | 3.01 | 3.01 | 3.02 | 3.04 | 3.02 | 3.01 | 3.02 | 3.02 | 0.01 | 0.06 | 0.73 | 5.36 | 5.35 | 5.37 | 5.37 | 5.36 | 5.34 | 0.01 | 0.48 | 0.36 |
| Nd | 13.13 | 13.14 | 13.09 | 13.20 | 13.23 | 13.20 | 13.16 | 13.09 | 0.05 | 0.57 | 0.73 | 24.82 | 24.83 | 24.94 | 24.92 | 24.88 | 24.27 | 0.06 | 2.50 | 0.45 |
| Sm | 3.31 | 3.32 | 3.30 | 3.36 | 3.31 | 3.34 | 3.32 | 3.30 | 0.02 | 0.68 | 1.34 | 6.20 | 6.18 | 6.20 | 6.14 | 6.18 | 6.02 | 0.02 | 2.60 | 0.73 |
| Eu | 1.09 | 1.09 | 1.09 | 1.10 | 1.10 | 1.10 | 1.10 | 1.09 | 0.01 | 0.39 | 0.92 | 2.05 | 2.05 | 2.06 | 2.05 | 2.05 | 2.04 | 0.00 | 0.45 | 0.47 |
| Gd | 3.72 | 3.69 | 3.71 | 3.74 | 3.73 | 3.72 | 3.72 | 3.71 | 0.02 | 0.20 | 0.92 | 6.22 | 6.25 | 6.24 | 6.27 | 6.25 | 6.21 | 0.02 | 0.61 | 0.56 |
| Tb | 0.63 | 0.62 | 0.63 | 0.63 | 0.63 | 0.63 | 0.63 | 0.63 | 0.00 | 0.43 | 1.39 | 0.95 | 0.95 | 0.96 | 0.97 | 0.96 | 0.94 | 0.01 | 1.72 | 1.56 |
| Dy | 3.82 | 3.83 | 3.81 | 3.85 | 3.81 | 3.82 | 3.82 | 3.81 | 0.02 | 0.39 | 0.84 | 5.26 | 5.31 | 5.28 | 5.30 | 5.29 | 5.28 | 0.02 | 0.13 | 0.72 |
| Ho | 0.79 | 0.79 | 0.79 | 0.79 | 0.78 | 0.79 | 0.79 | 0.79 | 0.00 | -0.13 | 1.02 | 0.98 | 0.99 | 0.99 | 0.99 | 0.98 | 0.99 | 0.00 | -0.40 | 0.85 |
| Er | 2.20 | 2.20 | 2.21 | 2.22 | 2.19 | 2.21 | 2.20 | 2.21 | 0.01 | -0.15 | 0.84 | 2.49 | 2.48 | 2.50 | 2.48 | 2.49 | 2.51 | 0.01 | -1.03 | 0.67 |
| Tm | 0.33 | 0.33 | 0.33 | 0.33 | 0.33 | 0.34 | 0.33 | 0.33 | 0.00 | 0.76 | 1.18 | 0.34 | 0.35 | 0.35 | 0.34 | 0.35 | 0.33 | 0.00 | 3.04 | 1.49 |
| Yb | 2.03 | 2.05 | 2.05 | 2.04 | 2.03 | 2.05 | 2.04 | 2.05 | 0.01 | -0.58 | 0.83 | 1.98 | 1.97 | 1.99 | 1.98 | 1.98 | 1.99 | 0.01 | -0.66 | 0.88 |
| Lu | 0.31 | 0.31 | 0.31 | 0.31 | 0.31 | 0.31 | 0.31 | 0.31 | 0.00 | -0.43 | 0.75 | 0.28 | 0.28 | 0.28 | 0.28 | 0.28 | 0.28 | 0.00 | 2.73 | 0.63 |
| Hf | 2.41 | 2.40 | 2.44 | 2.55 | 2.42 | 2.45 | 2.44 | 2.44 | 0.05 | 0.03 | 4.16 | 4.50 | 4.51 | 4.52 | 4.51 | 4.51 | 4.47 | 0.01 | 0.92 | 0.37 |
| Ta | 0.49 | 0.49 | 0.49 | 0.48 | 0.49 | 0.49 | 0.49 | 0.49 | 0.00 | -0.21 | 1.07 | 1.23 | 1.23 | 1.24 | 1.24 | 1.23 | 1.15 | 0.00 | 6.80 | 0.72 |
| Pb | 7.75 | 7.73 | 7.83 | 7.52 | 7.76 | 7.89 | 7.75 | 7.83 | 0.12 | -1.05 | 2.98 | 1.62 | 1.60 | 1.67 | 1.64 | 1.63 | 1.65 | 0.03 | -1.18 | 3.19 |
| Th | 2.16 | 2.16 | 2.18 | 2.21 | 2.15 | 2.19 | 2.17 | 2.18 | 0.02 | -0.19 | 1.83 | 1.21 | 1.22 | 1.22 | 1.23 | 1.22 | 1.22 | 0.01 | -0.38 | 1.16 |
| U | 0.50 | 0.50 | 0.50 | 0.52 | 0.50 | 0.51 | 0.50 | 0.50 | 0.01 | -0.07 | 2.46 | 0.42 | 0.42 | 0.42 | 0.42 | 0.42 | 0.41 | 0.00 | 1.98 | 0.86 |

Element concentrations are reported in ppm. Referenced values for USGS reference glass W-2 and BHVO-2 are taken from are from GeoReM (http://georem.mpch-mainz.gwdg.de).

Std, standard deviation. RE, relative error of the obtained average from the referenced value [100×(obtained average－ referenced value)/referenced value]. RSD, relative deviation of analyses (100×standard deviation/obtained average). RE and RSD measure the analytical accuracy and precision, respectively.

**Table S3. Analytical Sr-Nd-Pb-Li-Mo isotope ratios of standard samples.**

| **Standard**  **samples** | **δ98/95Mo (‰)** | **2SE** | **Standard**  **samples** | **δ98/95Mo (‰)** | **2SE** | **δ7Li (‰)** | **2SD** | **87Sr/86Sr** | **2SE** | **143Nd/144Nd** | **2SE** | **206Pb/204Pb** | **2SE** | **207Pb/204Pb** | **2SE** | **208Pb/204Pb** | **2SE** |
| --- | --- | --- | --- | --- | --- | --- | --- | --- | --- | --- | --- | --- | --- | --- | --- | --- | --- |
| **NIST3134** | 0.01 | 0.05 | **W-2a** | -0.05 | 0.04 |  |  |  |  |  |  |  |  |  |  |  |  |
| **NIST3134** | 0.01 | 0.04 | **W-2a** | -0.06 | 0.04 |  |  |  |  |  |  |  |  |  |  |  |  |
| **NIST3134** | 0.00 | 0.03 | **W-2a** | -0.04 | 0.01 |  |  |  |  |  |  |  |  |  |  |  |  |
| **NIST3134** | 0.04 | 0.03 | **W-2a** | -0.08 | 0.01 |  |  |  |  |  |  |  |  |  |  |  |  |
| **NIST3134** | 0.05 | 0.05 | **NBS987** |  |  |  |  | 0.710250 | 0.000012 |  |  |  |  |  |  |  |  |
| **NIST3134** | 0.03 | 0.05 | **NBS987** |  |  |  |  | 0.710246 | 0.000012 |  |  |  |  |  |  |  |  |
| **NIST3134** | 0.04 | 0.04 | **JNdi** |  |  |  |  |  |  | 0.512112 | 0.000008 |  |  |  |  |  |  |
| **NIST3134-** | -0.02 | 0.05 | **JNdi** |  |  |  |  |  |  | 0.512122 | 0.000009 |  |  |  |  |  |  |
| **NIST3134** | -0.04 | 0.05 | **BCR-2** |  |  |  |  | 0.705006 | 0.000008 | 0.512642 | 0.000010 | 18.7629 | 0.0005 | 15.6250 | 0.0004 | 38.7206 | 0.0010 |
| **NIST3134** | 0.02 | 0.04 | **BCR-2** |  |  |  |  | 0.705012 | 0.000008 | 0.512638 | 0.000011 |  |  |  |  |  |  |
| **NIST3134** | 0.00 | 0.05 | **GSP-2** |  |  | -0.7 | 0.1 |  |  |  |  |  |  |  |  |  |  |
| **NIST3134-** | -0.01 | 0.05 | **GSP-2** |  |  | -0.9 | 0.2 |  |  |  |  |  |  |  |  |  |  |
| **NIST3134** | -0.04 | 0.04 | **GSP-2** |  |  | -0.8 | 0.2 |  |  |  |  |  |  |  |  |  |  |
| **NIST3134** | -0.01 | 0.05 | **GSP-2** |  |  | -0.9 | 0.1 |  |  |  |  |  |  |  |  |  |  |
| **NIST3134** | -0.05 | 0.04 | **GSP-2** |  |  | -1.0 | 0.1 |  |  |  |  |  |  |  |  |  |  |
| **NIST3134** | 0.02 | 0.04 | **GSP-2** |  |  | -0.9 | 0.2 |  |  |  |  |  |  |  |  |  |  |
| **NIST3134** | 0.03 | 0.04 | **GSP-2** |  |  | -0.8 | 0.2 |  |  |  |  |  |  |  |  |  |  |
| **NIST3134** | 0.03 | 0.02 | **GSP-2** |  |  | -0.9 | 0.2 |  |  |  |  |  |  |  |  |  |  |
| **NIST3134** | 0.01 | 0.02 | **BHVO-2** |  |  | 4.6 | 0.3 |  |  |  |  |  |  |  |  |  |  |
| **NIST3134** | 0.00 | 0.03 | **BHVO-2** |  |  | 4.4 | 0.3 |  |  |  |  |  |  |  |  |  |  |
| **NIST3134** | 0.03 | 0.04 | **BHVO-2** |  |  | 4.3 | 0.2 |  |  |  |  |  |  |  |  |  |  |
| **NIST3134** | 0.02 | 0.03 | **BHVO-2** |  |  | 4.3 | 0.1 |  |  |  |  |  |  |  |  |  |  |
| **NIST3134** | 0.00 | 0.03 | **BHVO-2** |  |  | 4.3 | 0.3 |  |  |  |  |  |  |  |  |  |  |
| **NIST3134** | -0.02 | 0.03 |  |  |  |  |  |  |  |  |  |  |  |  |  |  |  |
| **NIST3134** | -0.05 | 0.03 |  |  |  |  |  |  |  |  |  |  |  |  |  |  |  |
| **NIST3134** | -0.02 | 0.03 |  |  |  |  |  |  |  |  |  |  |  |  |  |  |  |
| **NIST3134** | -0.05 | 0.03 |  |  |  |  |  |  |  |  |  |  |  |  |  |  |  |
| **NIST3134** | -0.01 | 0.02 |  |  |  |  |  |  |  |  |  |  |  |  |  |  |  |

**Table S4.** Major and trace element compositions of the volcanic rocks from the Mariana Islands and Mariana Trough.

| **Field** | ***Northern Mariana Islands*** | | | | ***Central Mariana Islands#*** | | | | | | | | | | | | | | |
| --- | --- | --- | --- | --- | --- | --- | --- | --- | --- | --- | --- | --- | --- | --- | --- | --- | --- | --- | --- |
| **Samples** | T1-1 | T1-1**r** | T1-3 | T1-4-01 | GUG6(1) | GUG9 | GUG11 | GUG12 | GUG13 | ALAM2 | ALAM5 | AGR2 | AGR4b | AGR5 | AGR8b | MM-92-6 | URA5 | URA7 | URA12 |
| SiO2 | 64.36 |  | 52.11 | 59.26 | 51.14 | 50.99 | 52.96 | 52.16 | 51.78 | 54.95 | 53.39 | 50.94 | 50.48 | 51.29 | 50.5 | 55.24 | 53.57 | 54.17 | 53.77 |
| TiO2 | 0.75 |  | 0.71 | 0.92 | 0.82 | 0.82 | 0.81 | 0.81 | 0.81 | 0.78 | 0.81 | 0.79 | 0.76 | 0.64 | 0.73 | 0.87 | 0.63 | 0.77 | 0.75 |
| Al2O3 | 15.04 |  | 14.83 | 16.01 | 19.85 | 19.6 | 19.88 | 20.04 | 19.94 | 17.4 | 17.17 | 16.84 | 18.45 | 17.74 | 20.2 | 16.49 | 16.63 | 19.2 | 19.62 |
| Fe2O3T | 6.58 |  | 9.87 | 7.45 | 10 | 10.07 | 9.32 | 9.73 | 9.67 | 9.58 | 10.05 | 12.45 | 11.08 | 10.43 | 9.83 | 10.67 | 9.61 | 9.73 | 9.55 |
| MnO | 0.15 |  | 0.17 | 0.15 | 0.18 | 0.18 | 0.18 | 0.18 | 0.18 | 0.18 | 0.19 | 0.23 | 0.21 | 0.2 | 0.19 | 0.24 | 0.18 | 0.19 | 0.19 |
| MgO | 1.68 |  | 7.31 | 2.96 | 3.99 | 4.23 | 3.38 | 3.49 | 3.47 | 4.4 | 4.86 | 4.98 | 4.8 | 5.38 | 3.55 | 3.15 | 6.13 | 2.71 | 2.68 |
| CaO | 4.75 |  | 11.74 | 7.14 | 11.07 | 11.05 | 10.22 | 10.73 | 10.66 | 8.98 | 9.97 | 10.46 | 10.83 | 10.89 | 11.15 | 7.68 | 10.52 | 9.64 | 9.93 |
| Na2O | 3.97 |  | 1.81 | 3.18 | 2.62 | 2.56 | 2.95 | 2.67 | 2.55 | 2.98 | 2.7 | 2.85 | 2.6 | 2.55 | 2.58 | 3.56 | 2.29 | 2.88 | 2.81 |
| K2O | 2.24 |  | 0.8 | 2.08 | 0.43 | 0.43 | 0.51 | 0.45 | 0.44 | 0.94 | 0.83 | 0.74 | 0.85 | 0.86 | 0.89 | 1.41 | 0.53 | 0.76 | 0.7 |
| P2O5 | 0.28 |  | 0.18 | 0.41 | 0.09 | 0.09 | 0.1 | 0.09 | 0.09 | 0.14 | 0.14 | 0.15 | 0.17 | 0.14 | 0.17 | 0.27 | 0.09 | 0.13 | 0.13 |
| LOI | 0.19 |  | 0.36 | 0.36 |  |  |  |  |  |  |  |  |  |  |  |  |  |  |  |
| Total | 99.99 |  | 99.89 | 99.92 | 100.18 | 100 | 100.29 | 100.36 | 99.58 | 100.36 | 100.13 | 100.45 | 100.23 | 100.11 | 99.78 | 99.59 | 100.2 | 100.19 | 100.13 |
| Li | 11.4 | 10.3 | 4.49 | 9.01 |  |  |  |  |  |  |  |  |  |  |  |  |  |  |  |
| Be | 1.23 | 1.35 | 0.641 | 1.88 |  |  |  |  |  |  |  |  |  |  |  |  |  |  |  |
| Sc | 15.1 | 14.9 | 42.1 | 22.2 |  |  |  |  |  |  |  |  |  |  |  |  |  |  |  |
| V | 85.8 | 86.2 | 331 | 214 | 283 | 227 | 241 | 286 | 265 | 218 | 264 | 341 | 262 | 243 | 257 | 205 | 235 | 232 | 208 |
| Cr | 2.19 | 2.22 | 275 | 24.2 | 10 | 12 | 4 | 53 | 2 | 20 | 22 | 6 | 6 | 12 | 6 |  | 49 | 2 | 2 |
| Co | 10.9 | 11 | 36.1 | 17.5 |  |  |  |  |  |  |  |  |  |  |  |  |  |  |  |
| Ni | 1.82 | 1.86 | 64.9 | 13.9 | 20 | 15 | 15 | 29 | 12 | 20 | 18 | 12 | 16 | 15 | 12 | 11 | 26 | 11 | 9 |
| Cu | 23 | 23.2 | 126 | 65.9 |  |  |  |  |  |  |  |  |  |  |  |  |  |  |  |
| Zn | 75 | 74.9 | 74.7 | 77.8 | 74 | 81 | 78 | 79 | 78 | 79 | 82 | 90 | 79 | 81 | 76 | 116 | 72 | 86 | 83 |
| Ga | 16.1 | 16.1 | 15.3 | 18 |  |  |  |  |  |  |  |  |  |  |  |  |  |  |  |
| Rb | 45.6 | 45.9 | 15.5 | 51.9 | 6.3 | 6.5 | 7.2 | 7.4 | 6.1 | 16.3 | 15.4 | 13 | 18 | 16.7 | 19.9 | 31.5 | 8.2 | 12 | 11.9 |
| Sr | 344 | 350 | 587 | 554 | 309 | 299 | 306 | 281 | 303 | 303 | 307 | 344 | 377 | 318 | 395 | 324 | 307 | 384 | 398 |
| Y | 36 | 35.8 | 16.9 | 32.5 | 20.9 | 20.1 | 23.5 | 21.7 | 21.6 | 26.7 | 24.1 | 20.1 | 19.5 | 20 | 18.1 | 29.8 | 20.2 | 24 | 23 |
| Zr | 163 | 163 | 50.4 | 150 | 53 | 50.4 | 60 | 53.5 | 53.4 | 82.9 | 74.4 | 51.9 | 58.9 | 64.5 | 59.2 | 96.3 | 49 | 62.6 | 59.4 |
| Nb | 4.94 | 4.93 | 1.84 | 8.63 | 0.78 | 0.73 | 0.7 | 0.72 | 0.67 | 1.3 | 1.24 | 1.01 | 1.15 | 1.23 | 1.13 | 1.86 | 1.04 | 1.66 | 1.6 |
| Sn | 1.34 | 1.34 | 0.639 | 1.17 |  |  |  |  |  |  |  |  |  |  |  |  |  |  |  |
| Cs | 1.08 | 1.04 | 0.332 | 0.73 | 0.33 |  | 0.271 | 0.198 |  |  | 0.589 | 0.16 | 0.171 | 0.289 | 0.463 | 0.733 | 0.365 |  |  |
| Ba | 653 | 660 | 360 | 589 | 160 | 139 | 190 | 172 | 162 | 251 | 238 | 158 | 177 | 183 | 165 | 278 | 198 | 290 | 245 |
| La | 27.1 | 27.2 | 16.2 | 39.5 | 3.14 | 2.85 | 3.18 | 3.26 | 2.75 | 5.9 | 5.85 | 6.84 | 7.56 | 7.49 | 7.45 | 11.41 | 4.45 | 7.97 | 7.29 |
| Ce | 50.6 | 51.4 | 30.4 | 73.4 | 8.23 | 7.63 | 8.53 | 8.43 | 7.53 | 14.04 | 13.51 | 14.71 | 16.02 | 15.97 | 15.76 | 23.98 | 10.17 | 16.8 | 15.57 |
| Pr | 6.46 | 6.46 | 3.85 | 8.86 | 1.38 | 1.3 | 1.46 | 1.40 | 1 28 | 2.17 | 2.12 | 2.24 | 2.41 | 2.4 | 2.34 | 3.53 | 1.54 | 2.41 | 2.21 |
| Nd | 26.4 | 26.5 | 16.1 | 35.2 | 7.02 | 6.57 | 7.47 | 7.08 | 6.59 | 10.33 | 10.12 | 10.48 | 11.08 | 10.95 | 10.73 | 15.88 | 7.25 | 10.75 | 9.98 |
| Sm | 5.9 | 5.91 | 3.59 | 7.19 | 2.25 | 2.14 | 2.43 | 2.27 | 2.21 | 3.05 | 2.99 | 2.9 | 2.95 | 2.84 | 2.79 | 4.11 | 2.15 | 2.97 | 2.79 |
| Eu | 1.59 | 1.59 | 1.12 | 2.06 | 0.85 | 0.81 | 0.92 | 0.84 | 0.83 | 0.97 | 1.01 | 1.03 | 1.04 | 0.93 | 0.99 | 1.37 | 0.81 | 1.07 | 1 |
| Gd | 6.06 | 6.07 | 3.4 | 6.7 | 2.91 | 2.86 | 3.19 | 2.94 | 2.96 | 3.86 | 3.73 | 3.33 | 3.27 | 3.2 | 3.17 | 4.84 | 2.8 | 3.68 | 3.41 |
| Tb | 0.985 | 0.985 | 0.523 | 1.01 | 0.562 | 0.547 | 0.626 | 0.559 | 0.573 | 0.727 | 0.693 | 0.603 | 0.586 | 0.592 | 0.563 | 0.874 | 0.528 | 0.699 | 0.638 |
| Dy | 5.94 | 5.93 | 2.99 | 5.69 | 3.38 | 3.29 | 3.72 | 3.38 | 3.51 | 4.29 | 4.1 | 3.47 | 3.3 | 3.3 | 3.16 | 4.93 | 3.19 | 4.19 | 3.8 |
| Ho | 1.27 | 1.27 | 0.602 | 1.14 | 0.743 | 0.727 | 0.83 | 0.743 | 0.781 | 0.933 | 0.89 | 0.741 | 0.698 | 0.708 | 0.667 | 1.058 | 0.696 | 0.882 | 0.827 |
| Er | 3.68 | 3.68 | 1.66 | 3.15 | 2.13 | 2.11 | 2.38 | 2.15 | 2.17 | 2.69 | 2.54 | 2.09 | 1.95 | 2.04 | 1.87 | 2.98 | 1.99 | 2.56 | 2.34 |
| Tm | 0.577 | 0.579 | 0.255 | 0.477 | 0.338 | 0.326 | 0.377 | 0.339 | 0.353 | 0.431 | 0.401 | 0.321 | 0.307 | 0.318 | 0.291 | 0.47 | 0.32 | 0.406 | 0.374 |
| Yb | 3.69 | 3.71 | 1.55 | 2.97 | 2.18 | 2.07 | 2.46 | 2.18 | 2.22 | 2.73 | 2.53 | 2.01 | 1.9 | 1.99 | 1.86 | 2.94 | 2.05 | 2.55 | 2.35 |
| Lu | 0.591 | 0.594 | 0.242 | 0.463 | 0.345 | 0.331 | 0.391 | 0.345 | 0.358 | 0.443 | 0.394 | 0.316 | 0.297 | 0.319 | 0.288 | 0.472 | 0.324 | 0.406 | 0.385 |
| Hf | 4.27 | 4.25 | 1.35 | 3.5 | 1.52 | 1.42 | 1.7 | 1.5 | 1.55 | 2.33 | 2.18 | 1.52 | 1.61 | 1.85 | 1.6 | 2.59 | 1.37 | 1.76 | 1.66 |
| Ta | 0.252 | 0.244 | 0.0846 | 0.423 | 0.073 | 0.061 | 0.069 | 0.066 | 0.059 | 0.093 | 0.095 | 0.065 | 0.073 | 0.08 | 0.088 | 0.117 | 0.072 | 0.101 | 0.092 |
| Pb | 6.91 | 6.91 | 3.65 | 5.39 | 0.86 | 2.03 | 2.44 | 1.81 | 1.92 | 3.14 | 3.24 | 1.83 | 1.2 | 2.03 | 1.79 | 3.01 | 2.06 | 2.76 | 2.59 |
| Th | 4.69 | 4.71 | 2.81 | 5.63 | 0.276 | 0.266 | 0.282 | 0.319 | 0.252 | 0.799 | 0.77 | 0.813 | 0.838 | 0.944 | 0.881 | 1.376 | 0.597 | 1.224 | 1.132 |
| U | 1.59 | 1.6 | 0.784 | 1.59 | 0.154 | 0.15 | 0.18 | 0.202 | 0.155 | 0.423 | 0.38 | 0.311 | 0.354 | 0.386 | 0.383 | 0.578 | 0.238 | 0.407 | 0.377 |

**Continued**

| **Field** | ***Central Mariana Trough*** | | | | | | | | | | ***Southern Mariana Trough*** | |
| --- | --- | --- | --- | --- | --- | --- | --- | --- | --- | --- | --- | --- |
| **Samples** | T2-1-01 | T2-1-02 | T2-2-01 | T2-3-01 | T2-3-02 | 13DS1* | 23DS1* | 42DS* | 53DS* | 71GTV-01* | T3-2-01 | T3-2-02 |
| SiO2 | 52.75 | 53.67 | 52.03 | 51.09 |  | 51.45 | 50.2 | 50.43 | 50.11 | 49.84 | 56.55 | 56.57 |
| TiO2 | 1.08 | 1.04 | 1.14 | 1.1 |  | 1.35 | 1 | 1.31 | 0.93 | 0.96 | 1.64 | 1.6 |
| Al2O3 | 16.17 | 15.58 | 16.32 | 18.19 |  | 16.54 | 16.41 | 17.17 | 16.74 | 16.18 | 14.98 | 14.88 |
| Fe2O3T | 9.36 | 9.21 | 8.42 | 8.02 |  | 8.03 | 7.53 | 7.56 | 7.03 | 7.53 | 10.3 | 10.12 |
| MnO | 0.16 | 0.16 | 0.14 | 0.14 |  | 0.15 | 0.15 | 0.14 | 0.13 | 0.14 | 0.19 | 0.19 |
| MgO | 5.67 | 5.63 | 6.94 | 6.67 |  | 6.68 | 9.06 | 7.06 | 9.87 | 8.64 | 2.78 | 2.83 |
| CaO | 10.25 | 9.92 | 10.86 | 10.88 |  | 10.78 | 11.55 | 10.9 | 11.57 | 12.83 | 6.51 | 6.41 |
| Na2O | 2.98 | 2.99 | 2.74 | 2.9 |  | 3.01 | 2.36 | 2.96 | 2.37 | 2.51 | 4.02 | 3.97 |
| K2O | 0.6 | 0.49 | 0.5 | 0.44 |  | 0.5 | 0.37 | 0.51 | 0.37 | 0.32 | 0.86 | 0.82 |
| P2O5 | 0.17 | 0.16 | 0.15 | 0.16 |  | 0.17 | 0.1 | 0.14 | 0.1 | 0.1 | 0.24 | 0.24 |
| LOI | 0.8 | 1.05 | 0.65 | 0.32 |  | 0.62 | 0.45 | 0.33 | 0.31 | 0.29 | 1.9 | 2.3 |
| Total | 99.99 | 99.9 | 99.9 | 99.9 |  | 99.45 | 99.4 | 98.7 | 99.7 | 99.52 | 99.97 | 99.92 |
| Li | 3.46 | 6.01 | 3.41 | 3.41 | 2.66 | 4.44 | 3.45 | 2.55 | 3.06 | 3.59 | 5.65 | 6.53 |
| Be | 0.648 | 0.694 | 0.615 | 0.588 | 0.556 | 0.54 | 0.38 | 0.62 | 0.37 | 0.4 | 0.865 | 0.92 |
| Sc | 33.5 | 33.4 | 35.6 | 30.2 | 28.2 | 33.3 | 29.4 | 25.1 | 27.2 | 23.4 | 22.7 | 25.4 |
| V | 263 | 263 | 247 | 218 | 206 | 218 | 221 | 234 | 204 | 228 | 171 | 169 |
| Cr | 30.2 | 29.7 | 244 | 217 | 200 | 223 | 313 | 260 | 545 | 293 | 1.83 | 1.78 |
| Co | 33.2 | 32.9 | 33.6 | 31.7 | 29.8 | 32.9 | 37.7 | 33 | 39.8 | 38.8 | 18.8 | 19.2 |
| Ni | 27.5 | 26.7 | 85.9 | 92.6 | 86.9 | 87.3 | 155 | 103 | 219 | 98.3 | 3.16 | 3.19 |
| Cu | 42.3 | 42.8 | 55.8 | 41.8 | 39.7 | 56.8 | 45.2 | 45.6 | 48.7 | 53.3 | 20.9 | 21.2 |
| Zn | 68.9 | 69 | 62.3 | 58.8 | 56.5 | 56.1 | 81.8 | 76.5 | 53.9 | 59.1 | 101 | 107 |
| Ga | 16.6 | 16.5 | 16.2 | 16.3 | 16 | 16 | 15.3 | 16 | 14.6 | 14.5 | 20 | 21.2 |
| Rb | 9.93 | 9.94 | 6.73 | 6.07 | 6.27 | 3.34 | 5.76 | 4.93 | 5.73 | 3.64 | 8.95 | 8.89 |
| Sr | 233 | 230 | 208 | 235 | 243 | 214 | 168 | 192 | 167 | 247 | 161 | 165 |
| Y | 24.8 | 24.7 | 26.2 | 24.2 | 25.1 | 23.5 | 20 | 24.6 | 19.3 | 16.8 | 48.7 | 49.2 |
| Zr | 81.3 | 80.8 | 93.1 | 91.1 | 91.4 | 82 | 62.2 | 99 | 56.7 | 61.3 | 161 | 159 |
| Nb | 2.98 | 2.98 | 3.26 | 2.74 | 2.99 | 3 | 2.66 | 7.84 | 1.92 | 3.53 | 4.39 | 4.5 |
| Sn | 0.899 | 0.848 | 0.983 | 0.972 | 0.914 | 0.91 | 0.63 | 1.07 | 0.56 | 0.7 | 1.58 | 1.6 |
| Cs | 0.148 | 0.141 | 0.0907 | 0.101 | 0.112 | 0.26 | 0.3 | 0.27 | 0.32 | 0.27 | 0.154 | 0.163 |
| Ba | 64.9 | 64.5 | 39.6 | 46.1 | 48.9 | 32.4 | 34.9 | 29.6 | 28.6 | 48 | 70.4 | 71.5 |
| La | 7.05 | 7.05 | 5.38 | 5.55 | 5.87 | 4.96 | 3.34 | 4.86 | 3.2 | 3.79 | 7.26 | 7.15 |
| Ce | 16 | 16 | 13.6 | 13.9 | 14.5 | 12.8 | 8.59 | 13 | 8.23 | 9.43 | 20.1 | 19.8 |
| Pr | 2.41 | 2.41 | 2.14 | 2.18 | 2.25 | 1.99 | 1.36 | 2.1 | 1.31 | 1.49 | 3.24 | 3.26 |
| Nd | 11.5 | 11.5 | 10.6 | 10.7 | 11 | 10.5 | 7.42 | 11 | 7.14 | 7.95 | 16.7 | 16.8 |
| Sm | 3.3 | 3.25 | 3.18 | 3.12 | 3.19 | 3.23 | 2.49 | 3.37 | 2.37 | 2.44 | 5.3 | 5.5 |
| Eu | 1.2 | 1.2 | 1.17 | 1.14 | 1.16 | 1.19 | 0.96 | 1.23 | 0.92 | 0.94 | 1.79 | 1.8 |
| Gd | 3.95 | 3.92 | 3.94 | 3.76 | 3.72 | 3.52 | 2.88 | 3.71 | 2.69 | 2.66 | 6.93 | 6.78 |
| Tb | 0.675 | 0.673 | 0.697 | 0.653 | 0.661 | 0.7 | 0.58 | 0.75 | 0.55 | 0.52 | 1.24 | 1.27 |
| Dy | 4.16 | 4.14 | 4.33 | 4.09 | 4.18 | 4.5 | 3.85 | 4.76 | 3.7 | 3.23 | 7.9 | 7.74 |
| Ho | 0.883 | 0.88 | 0.933 | 0.861 | 0.883 | 0.96 | 0.83 | 1 | 0.77 | 0.7 | 1.72 | 1.64 |
| Er | 2.5 | 2.51 | 2.64 | 2.45 | 2.51 | 2.77 | 2.39 | 2.92 | 2.29 | 1.98 | 4.99 | 4.84 |
| Tm | 0.386 | 0.381 | 0.408 | 0.374 | 0.384 | 0.44 | 0.38 | 0.44 | 0.36 | 0.3 | 0.774 | 0.754 |
| Yb | 2.36 | 2.35 | 2.52 | 2.32 | 2.36 | 2.76 | 2.43 | 2.84 | 2.27 | 1.93 | 4.82 | 4.69 |
| Lu | 0.364 | 0.364 | 0.385 | 0.358 | 0.369 | 0.4 | 0.34 | 0.44 | 0.32 | 0.3 | 0.757 | 0.75 |
| Hf | 2.03 | 2.02 | 2.24 | 2.18 | 2.26 | 2.45 | 1.97 | 2.6 | 1.8 | 1.65 | 4.09 | 4.12 |
| Ta | 0.183 | 0.18 | 0.207 | 0.179 | 0.184 | 0.35 | 0.25 | 0.53 | 0.18 | 0.28 | 0.284 | 0.32 |
| Pb | 1.07 | 1.05 | 0.856 | 0.989 | 0.88 | 1 | 1.1 | 2.19 | 0.97 | 3.07 | 1.39 | 1.4 |
| Th | 0.668 | 0.675 | 0.427 | 0.47 | 0.481 | 0.35 | 0.27 | 0.32 | 0.23 | 0.25 | 0.537 | 0.505 |
| U | 0.426 | 0.241 | 0.243 | 0.184 | 0.174 | 0.14 | 0.12 | 0.14 | 0.13 | 0.22 | 0.233 | 0.243 |

#: Major and trace elements of samples from Central Mariana Islands are from Elliott et al. (1997).

*: Major and trace elements of samples 13DS1, 23DS1, 42DS, 53DS and 71GTV-01 are from Yan et al. (2019).

**r**: Replicate analysis on the sample powder.

**Table S5. Mo contents and Sr-Nd-Pb-Li-Mo isotope compositions of the volcanic rocks from the Mariana Islands and Mariana Trough.**

| **Samples** | **Mo (ppm)** | **δ98/95Mo (‰)** | **2SE** | **δ7Li (‰)** | **2SD** | **87Sr/86Sr** | **2SE** | **143Nd/144Nd** | **2SE** | **206Pb/204Pb** | **2SE** | **207Pb/204Pb** | **2SE** | **208Pb/204Pb** | **2SE** |
| --- | --- | --- | --- | --- | --- | --- | --- | --- | --- | --- | --- | --- | --- | --- | --- |
| ***Northern Mariana Islands*** | | | | | | | | | | | | | | | |
| T1-1 | 2.57(**2.58r**) | 0.38(**0.38r**) | 0.05(**0.04r**) | 4.4 | 0.0 | 0.703624 | 0.00001 | 0.512937 | 0.000006 | 19.0187 | 0.0006 | 15.6544 | 0.0005 | 38.8253 | 0.0013 |
| T1-3 | 0.78 | 0.07 | 0.03 | 3.8 | 0.3 | 0.703543 | 0.000009 | 0.512899 | 0.000007 | 18.9835 | 0.0006 | 15.6616 | 0.0005 | 38.8414 | 0.0012 |
| T1-4-01 | 1.15 | -0.13 | 0.03 | 3.2 | 0.0 | 0.703663 | 0.000016 | 0.512859 | 0.000007 | 18.8857 | 0.0005 | 15.6597 | 0.0005 | 38.8061 | 0.0012 |
| T1-4-02 | 1.55 | -0.18 | 0.03 |  |  |  |  |  |  |  |  |  |  |  |  |
| ***Central Mariana Islands#*** | | | | | | | | | | | | | | | |
| GUG6(1) | 0.398 | 0.15 | 0.023 |  |  |  |  | 0.513042 |  | 18.7545 | 0.0008 | 15.5511 | 0.0008 | 38.334 | 0.0024 |
| GUG9 | 0.776 | 0.067 | 0.02 |  |  | 0.70345 |  | 0.513043 |  | 18.7553 | 0.0009 | 15.5509 | 0.0008 | 38.3351 | 0.0026 |
| GUG11 | 1.003 | 0.049 | 0.016 |  |  | 0.7035 |  | 0.513052 |  | 18.7671 | 0.0012 | 15.5533 | 0.001 | 38.3413 | 0.0033 |
| GUG12 | 0.894 | 0.021 | 0.025 |  |  |  |  | 0.513037 |  | 18.7743 | 0.0011 | 15.5496 | 0.001 | 38.331 | 0.0032 |
| GUG13 | 0.856 | 0.038 | 0.031 |  |  | 0.70349 |  | 0.513043 |  | 18.7626 | 0.0013 | 15.5514 | 0.001 | 38.3366 | 0.0036 |
| GUG13r | 0.905 | 0.02 | 0.02 |  |  |  |  |  |  |  |  |  |  |  |  |
| ALAM2 | 1.277 | 0.082 | 0.021 |  |  | 0.70356 |  | 0.513006 |  | 18.7971 | 0.0035 | 15.5694 | 0.0031 | 38.4398 | 0.0099 |
| ALAM5 | 1.072 | 0.047 | 0.014 |  |  | 0.70365 |  | 0.513017 |  |  |  |  |  |  |  |
| AGR2 | 0.492 | -0.092 | 0.018 |  |  | 0.70337 |  | 0.512992 |  | 18.7674 | 0.0008 | 15.5469 | 0.0007 | 38.3696 | 0.0023 |
| AGR4b | 0.563 | -0.13 | 0.012 |  |  | 0.70338 |  | 0.512981 |  | 18.7809 | 0.001 | 15.5503 | 0.0009 | 38.3767 | 0.0028 |
| AGR4br | 0.631 | -0.172 | 0.025 |  |  |  |  |  |  |  |  |  |  |  |  |
| AGR5 | 0.623 | -0.099 | 0.025 |  |  |  |  | 0.512996 |  |  |  |  |  |  |  |
| AGR8b | 0.595 | -0.113 | 0.014 |  |  |  |  | 0.512987 |  |  |  |  |  |  |  |
| AGR8br | 0.629 | -0.122 | 0.022 |  |  |  |  |  |  |  |  |  |  |  |  |
| MM-92-6 | 0.998 | -0.083 | 0.022 |  |  |  |  | 0.512987 |  |  |  |  |  |  |  |
| URA5 | 0.71 | 0.059 | 0.015 |  |  | 0.70365 |  | 0.51301 |  | 18.8719 | 0.0011 | 15.5736 | 0.0011 | 38.5102 | 0.0033 |
| URA5r | 0.746 | 0.069 | 0.019 |  |  |  |  |  |  |  |  |  |  |  |  |
| URA7 | 0.907 | 0.054 | 0.017 |  |  | 0.70354 |  | 0.512984 |  | 18.8712 | 0.0016 | 15.5796 | 0.0014 | 38.511 | 0.0044 |
| URA12 | 0.909 | 0.043 | 0.022 |  |  | 0.70354 |  | 0.512966 |  | 18.8672 | 0.0021 | 15.5749 | 0.0019 | 38.4978 | 0.0059 |
| ***Central Mariana Trough*** | | | | | | | | | | | | | | | |
| T2-1-01 | 0.44 | -0.41 | 0.04 | 3.6 | 0.1 | 0.703061 | 0.00001 | 0.513034 | 0.000008 | 18.53 | 0.0005 | 15.5734 | 0.0005 | 38.3401 | 0.0014 |
| T2-1-02 | 0.39 | -0.17 | 0.04 | 2.6 | 0.2 | 0.702988 | 0.000016 | 0.513026 | 0.000006 | 18.5397 | 0.0005 | 15.5741 | 0.0005 | 38.3465 | 0.0011 |
| T2-1-03 | 0.45 | -0.37 | 0.05 |  |  |  |  |  |  |  |  |  |  |  |  |
| T2-1-04 | 0.42 | -0.29 | 0.09 |  |  |  |  |  |  |  |  |  |  |  |  |
| T2-2-01 | 0.47 | -0.64 | 0.03 | 2.2(**2.5r**) | 0.1(**0.1r**) | 0.702891 | 0.000012 | 0.513081 | 0.000008 | 18.312 | 0.0005 | 15.5453 | 0.0004 | 38.1471 | 0.0011 |
| T2-2-02 | 0.5 | -0.65 | 0.05 |  |  |  |  |  |  |  |  |  |  |  |  |
| T2-3-01 | 0.37 | -0.3 | 0.04 | 3.5 | 0.2 | 0.702932 | 0.000013 | 0.513083 | 0.000008 | 18.3825 | 0.0005 | 15.5549 | 0.0004 | 38.2037 | 0.0012 |
| T2-3-02 | 0.39 | -0.39 | 0.05 |  |  |  |  |  |  |  |  |  |  |  |  |
| 13DS1 | 0.78 | -0.43 | 0.06 | 4.0 | 0.1 | 0.702951 | 0.000005 | 0.513087 | 0.000002 | 18.2176 | 0.0007 | 15.4823 | 0.0006 | 37.9314 | 0.0016 |
| 23DS1 | 0.31 | -0.21 | 0.07 | 3.8 | 0.2 | 0.702944 | 0.000007 | 0.513076 | 0.000003 | 18.1669 | 0.0008 | 15.4809 | 0.0006 | 37.8854 | 0.0015 |
| 42DS | 0.34 | -0.27 | 0.07 | 3.1 | 0.2 | 0.702782 | 0.000007 | 0.513111 | 0.000002 | 18.0263 | 0.0006 | 15.454 | 0.0004 | 37.7353 | 0.001 |
| 53DS | 0.21 | -0.17 | 0.11 | 2.3(**2.4r**) | 0.1(**0.0r**) | 0.702913 | 0.000006 | 0.513098 | 0.000004 | 18.4452 | 0.0007 | 15.4678 | 0.0005 | 38.1965 | 0.0009 |
| 71GTV-01 | 0.43 | -0.2 | 0.09 | 3.9 | 0.1 | 0.704599 | 0.000009 | 0.513073 | 0.000003 | 18.2474 | 0.0005 | 15.4851 | 0.0004 | 37.9303 | 0.0012 |
| 71GTV-02 | 0.43 | -0.26 | 0.06 | 4.1 | 0.1 |  |  |  |  |  |  |  |  |  |  |
| ***Southern Mariana Trough*** | | | | | | | | | | | | | | | |
| T3-2-01 | 0.7 | -0.07 | 0.04 | 6.4 | 0.0 | 0.703076 | 0.000016 | 0.513093 | 0.000008 | 18.5605 | 0.0005 | 15.5609 | 0.0004 | 38.3027 | 0.0011 |
| T3-2-02 | 0.73 | -0.09 | 0.04 | 6.1 | 0.3 | 0.70309 | 0.000011 | 0.513091 | 0.000006 | 18.5662 | 0.0006 | 15.5666 | 0.0005 | 38.3322 | 0.0014 |

#: Sr-Nd isotopes of samples from Central Mariana Islands are from Elliott et al. (1997); Mo-Pb isotopes and Mo contents of samples from Central Mariana Islands are from Freymuth et al. (2015).

**r**: Replicate analysis on separate dissolution of the sample powder.

**Table S6.** Parameters for the mixing calculations

|  | **Mo** | **δ98/95Mo (‰)** | **Li** | **δ7Li (‰)** | **Sr** | **87Sr/86Sr** | **Nd** | **143Nd/144Nd** | **Pb** | **207Pb/204Pb** |
| --- | --- | --- | --- | --- | --- | --- | --- | --- | --- | --- |
| Depleted mantle | 0.46a | -0.21b | 6.5a | 3.5c | 129a | 0.702819a | 12.03a | 0.513074a | 0.57a | 15.515a |
| Residual slab melt | 4.42d | -1.26d | 22.6e | -1.49e | 81f | 0.705474f | 11.22f | 0.513174f | 4.05g | 15.5947g |

All elements are in ppm. Residual slab melt is represented by eclogite.

a: values estimated from MORBs (Gale et al., 2013);

b: representative value from Bezard et al. (2016);

c: representative value from Marschall et al. (2017);

d: values estimated from rutile (the dominant host of Mo) with the lowest δ98/95Mo in Chen et al. (2019);

e: values estimated from eclogites in Su et al. (2016);

f: values estimated the average for MORB-type eclogites (Chen et al., 2019);

g: values estimated from the average for Sumdo eclogites (Liu et al., 2019).

## REFERENCES CITED

Bezard, R., Fischer-Gödde, M., Hamelin, C., Brennecka, G. A., and Kleine, T., 2016, The effects of magmatic processes and crustal recycling on the molybdenum stable isotopic composition of Mid-Ocean Ridge Basalts: Earth and Planetary Science Letters, v. 453, p. 171-181, doi:10.1016/j.epsl.2016.07.056.

Chen, S., Hin, R. C., John, T., Brooker, R., Bryan, B., Niu, Y., and Elliott, T., 2019, Molybdenum systematics of subducted crust record reactive fluid flow from underlying slab serpentine dehydration: Nature Communications, v. 10(1), p. 1-9, doi:10.1038/s41467-019-12696-3.

Elliott, T., Plank, T., Zindler, A., White, W., Bourdon, B., 1997. Element transport from slab to volcanic front at the Mariana arc: Journal of Geophysical Research, v. 102 (B7), p. 14991–15019, doi:10.1029/97JB00788.

Freymuth, H., Vils, F., Willbold, M., Taylor, R. N., and Elliott, T., 2015, Molybdenum mobility and isotopic fractionation during subduction at the Mariana arc: Earth and Planetary Science Letters, v. 432, p. 176-186, doi:10.1016/j.epsl.2015.10.006.

Gale, A., Dalton, C. A., Langmuir, C. H., Su, Y., and Schilling, J. G., 2013, The mean composition of ocean ridge basalts: Geochemistry, Geophysics, Geosystems, v. 14(3), p. 489-518, doi:10.1029/2012GC004334.

Hayes, G., Wald, D., and Johnson, R., 2012, Slab 1.0: A Three-Dimensional Model of Global Subduction Zone Geometries: Journal of Geophysical Research: Solid Earth, v. 117(B1), doi:10.1029/2011JB008524.

Liu, H., Sun, H., Xiao, Y., Wang, Y., Zeng, L., Li, W., Guo, H., Yu, H., and Pack, A., 2019, Lithium isotope systematics of the Sumdo Eclogite, Tibet: Tracing fluid/rock interaction of subducted low-T altered oceanic crust. Geochimica et Cosmochimica Acta, v. 246, p. 385-405, doi:10.1016/j.gca.2018.12.002.

Marschall, H. R., Wanless, V. D., Shimizu, N., von Strandmann, P. A. P., Elliott, T., and Monteleone, B. D., 2017, The boron and lithium isotopic composition of mid-ocean ridge basalts and the mantle: Geochimica et Cosmochimica Acta, v. 207, p. 102-138, doi:10.1016/j.gca.2017.03.028.

Su, B. X., Zhou, M. F., and Robinson, P. T., 2016, Extremely large fractionation of Li isotopes in a chromitite-bearing mantle sequence: Scientific reportsReports, v. 6, 22370, doi:10.1038/srep22370.

Yan, Q., Zhang, P., Metcalfe, I., Liu, Y., Wu, S., and Shi, X., 2019, Geochemistry of axial lavas from the mid-and southern Mariana Trough, and implications for back-arc magmatic processes: Mineralogy and Petrology, v. 113(6), p. 803-820, doi:10.1007/s00710-019-00683-x.
